# Supplementary material
Source: MDPI journal article supplement (https://www.mdpi.com/2411-5150/7/3/55)
Supplement: s1 [file s1]

**Table S1: List of paintings used at Encoding and Discrimination stage collapsed by authors and motifs.**

| Author                   | Title                                          | Year    |
|--------------------------|------------------------------------------------|---------|
| <b>Encoding stage</b>    |                                                |         |
| Baldung Grien, Hans      | <i>The Three Graces</i>                        | c. 1540 |
| Canova, Antonio          | <i>The Three Graces Dancing</i>                | c. 1799 |
| Cranach, Lucas the Elder | <i>The Three Graces</i>                        | 1535    |
| Furini, Francesco        | <i>The Three Graces</i>                        | c. 1633 |
| Rubens, Peter Paul       | <i>The Three Graces</i>                        | 1639    |
| Rafaello Sanzio          | <i>The Three Graces</i>                        | 1504    |
| Rubens, Peter Paul       | <i>Nature Adoring the Three Graces</i>         | c. 1615 |
| Botticelli, Sandro       | <i>Primavera</i>                               | c. 1482 |
| Tintoretto               | <i>Mercury and the Graces</i>                  | c. 1576 |
| Bronkhorst, Jan Gerritsz | <i>The Three Graces</i>                        | c. 1645 |
| Moser, Koloman           | <i>The Three Graces</i>                        | 1905    |
| Carle van Loo            | <i>The Three Graces</i>                        | 1763    |
| Mathews, Arthur Frank    | <i>Song of the Sea (Three Graces)</i>          | c. 1909 |
| Dali, Salvador           | <i>Enchanted Beach With Three Fluid Graces</i> | 1938    |
| Delaunay, Robert         | <i>La Ville de Paris</i>                       | 1912    |
| Scalbert, Jules          | <i>The Three Graces dancing with Faun</i>      | c. 1877 |
| Janco, Marcel            | <i>The Three Women in Malta</i>                | 1930    |
| Fragonard, Jean_Honore   | <i>The Three Graces</i>                        | 1756    |
| Etty, Wiliam             | <i>Venus and Her Satellites</i>                | 1835    |
| Picasso, Pablo           | <i>Three woman</i>                             | 1908    |
| Botticelli, Sandro       | <i>Judith Leaving the Tent of Holofernes</i>   | c. 1495 |
| Cairo, Francesco del     | <i>Judith with Head of Holofernes</i>          | c. 1645 |
| Catena, Vincenzo         | <i>Judith</i>                                  | 1520    |
| Elsheimer, Adam          | <i>Judith Beheading Holofernes</i>             | 1601    |
| Gentileschi, Artemisia   | <i>Judith and Her Maidservant</i>              | c. 1614 |
| Allori, Cristofano       | <i>Judith with Head of Holofernes</i>          | 1613    |
| Giorgione                | <i>Judith</i>                                  | c.1504  |

|                              |                                          |         |
|------------------------------|------------------------------------------|---------|
| Riedel, August               | <i>Judith</i>                            | 1840    |
| Rubens, Peter Paul           | <i>Judith with Head of Holofernes</i>    | c.1616  |
| Tintoretto                   | <i>Judith and Holofernes</i>             | c.1579  |
| Tiziano                      | <i>Judith</i>                            | c. 1515 |
| Klimt, Gustav                | <i>Judith I</i>                          | 1901    |
| Valentin de Boulogne         | <i>Judith</i>                            | c. 1626 |
| Corot, Jean_Baptiste-Camille | <i>Judith</i>                            | c. 1872 |
| Moser, Koloman               | <i>Judith and Holofernes</i>             | 1916    |
| Mellin, Charles              | <i>Judith with Head of Holofernes</i>    | 1630    |
| Piazzetta, Giovanni Battista | <i>Judith and Holofernes</i>             | c. 1745 |
| Cranach, Lucas the Elder     | <i>Judith Victorious over Holofernes</i> | c. 1520 |
| Carrachi, Agostino           | <i>Judith</i>                            | c.1590  |
| Stuck, Franz                 | <i>Judith</i>                            | 1928    |
| Renoir, Pierre-Auguste       | <i>Large Bathers</i>                     | c. 1884 |
| Seurant, Georges             | <i>Bathers at Asnieres</i>               | c. 1883 |
| Bazille, Jean-Frederic       | <i>Bathers (summer Scene)</i>            | 1869    |
| Vernet, Claude-Joseph        | <i>Landscape with Bathers</i>            | 1783    |
| Cezanne, Paul                | <i>Bathers Beneath a Bridge</i>          | c. 1895 |
| Coubert, Gustave             | <i>The Bathers</i>                       | 1853    |
| Gauguin, Paul                | <i>The Bathers</i>                       | 1897    |
| Fragonard, Jean-Honore       | <i>The Bathers</i>                       | c. 1772 |
| Carracci                     | <i>Landscape with Bathers</i>            | 1616    |
| Cezanne, Paul                | <i>The Large Bathers</i>                 | c. 1900 |
| Kirchner, Ernst Ludwig       | <i>Bathers at Mortizburg</i>             | c. 1909 |
| Cezanne, Paul                | <i>Bathers</i>                           | c. 1872 |
| Cezanne, Paul                | <i>Bathers</i>                           | c. 1890 |
| Andre Derain                 | <i>Bathers</i>                           | 1907    |
| Picasso, Pablo               | <i>Bathers with Toy Boat</i>             | 1937    |
| Picasso, Pablo               | <i>Bathers</i>                           | 1918    |
| Picasso, Pablo               | <i>Les Demoiselles d'Avignon</i>         | 1907    |
| Walker, Frederick            | <i>The Bathers</i>                       | c. 1866 |
| Matisse, Henri               | <i>Joy of Life</i>                       | c. 1905 |
| Matisse, Henri               | <i>Bathers with turtle</i>               | 1908    |
| Leighton, Frederic           | <i>Odalisque</i>                         | 1862    |

|                                |                                           |          |
|--------------------------------|-------------------------------------------|----------|
| Boucher, Francois              | <i>Brown Odalisque</i>                    | 1745     |
| Delacroix, Eugene              | <i>Odalisque</i>                          | 1857     |
| Ingres, Jean-Auguste-Dominique | <i>The Grand Odalisque</i>                | 1814     |
| Renoir, Pierre-Auguste         | <i>Odalisque</i>                          | 1870     |
| Matisse, Henri                 | <i>Odalisque, Harmony in Red</i>          | c. 1926  |
| Tanoux, Adrien Henri           | <i>Odalisque</i>                          | 1913     |
| Schiovoni, Natale              | <i>Odalisque</i>                          | 1845     |
| Matisse, Henri                 | <i>Odalisque</i>                          | 1926     |
| Picasso, Pablo                 | <i>The Great Odalisque (after Ingres)</i> | 1907     |
| Picou, Henri Pierre            | <i>Odalisque</i>                          | 1858     |
| Picasso, Pablo                 | <i>Woman of Algier (Version N)</i>        | 1955     |
| Picasso, Pablo                 | <i>Jacqueline in Turkish Dress</i>        | 1955     |
| Corot, Jean_Baptiste-Camille   | <i>The Roman Odalisque</i>                | 1843     |
| Fabbi, Fabio                   | <i>Girls of the Harem</i>                 | c. 1906  |
| Delacroix, Eugene              | <i>The Women of Algiers in Their</i>      | 1834     |
| Jonghe, Gustave Leonard        | <i>A reclining Odalisque</i>              | c. 1870  |
| Fortuny, Maria                 | <i>The Odalisque</i>                      | 1861     |
| Lefebvre, Jules Joseph         | <i>Odalisque</i>                          | 1874     |
| Bukovac, Vlaho                 | <i>Odalisque</i>                          | 1882     |
| Botticelli, Sandro             | <i>The Birth of Venus</i>                 | 1486     |
| Cabanel                        | <i>The Birth of Venus</i>                 | 1683     |
| Fauconnet, Guy Pierre          | <i>Venus</i>                              | 1919     |
| Titian                         | <i>The Venus of Urbino</i>                | 1538     |
| Picasso, Pablo                 | <i>Nude woman with Necklece</i>           | 1968     |
| Cranach, Lucas the Elder       | <i>Cupid Complaining to Venus</i>         | 1525     |
| Sustris, Lambert               | <i>Venus and Love</i>                     | 1550     |
| Matisse, Henri                 | <i>Venus</i>                              | 1952     |
| Rosetti, D. G.                 | <i>Venus</i>                              | c. 1863- |
| Velazques, Diego               | <i>Venus at her Mirror</i>                | 1601     |
| Gossart, Jan                   | <i>Venus</i>                              | c. 1521  |
| Rubens, Peter Paul             | <i>Venus at a Mirror</i>                  | c. 1615  |
| Modigliani, Amadeo             | <i>Venus-Maja</i>                         | 1917     |
| Rembrandt van Rijn             | <i>Hendrickje Stoffels as Venus</i>       | 1662     |

|                                |                                                |         |
|--------------------------------|------------------------------------------------|---------|
| Albani, Francesco              | <i>Venus Attended by Nymphs and Cupids</i>     | 1633    |
| Bollandt, Heinrich             | <i>Venus and Amor</i>                          | c. 1520 |
| Lambert, Sustris               | <i>Venus and Love</i>                          | 1550    |
| Boucher, Francois              | <i>The Triumph of Venus</i>                    | 1740    |
| Ingres, Jean-Auguste-Dominique | <i>Venus Anadyamene</i>                        | c. 1825 |
| Dali, Salvador                 | <i>Venus Binding Cupids</i>                    | 1925    |
| <b>Discrimination stage</b>    |                                                |         |
| Aachen, Hans von               | <i>The three Graces</i>                        | 1604    |
| Bisson, Eduard                 | <i>The Three Graces</i>                        | 1899    |
| Bouvier, Jules Augustus        | <i>The Three Graces</i>                        | 1875    |
| Cranach, Lucas the Elder       | <i>The Three Graces</i>                        | 1531    |
| Delaunay, Robert               | <i>The Three Graces</i>                        | 1912    |
| Frost, William                 | <i>The Three Graces</i>                        | c. 1854 |
| Picasso, Pablo                 | <i>The Three Graces</i>                        | 1908    |
| Picasso, Pablo                 | <i>The Three dancers</i>                       | 1925    |
| Vernon, Emile                  | <i>The Three Graces</i>                        | 1917    |
| Rubens, Peter Paul             | <i>The Three Graces</i>                        | 1620    |
| Botticelli, Sandro             | <i>Primavera</i>                               | c. 1482 |
| Bronchorst, Jan Gerritsz       | <i>The Three Graces</i>                        | c. 1645 |
| Dali, Salvador                 | <i>Enchanted Beach With Three Fluid Graces</i> | 1938    |
| Etty, Wiliam                   | <i>Venus and Her Satellites</i>                | 1835    |
| Furini, Francesco              | <i>The Three Graces</i>                        | c. 1633 |
| Janco, Marcel                  | <i>The Three Women in Malta</i>                | 1930    |
| Mathews, Arthur Frank          | <i>Song of the Sea (Three Graces)</i>          | c. 1909 |

|                              |                                                 |         |
|------------------------------|-------------------------------------------------|---------|
| Picasso, Pablo               | <i>Three woman</i>                              | 1908    |
| Rubens, Peter Paul           | <i>The Three Graces</i>                         | c. 1615 |
| Tintoretto                   | <i>Mercury and the Graces</i>                   | c. 1576 |
| Botticelli, Sandro           | <i>The return Judith to Bethulia</i>            | 1427    |
| Carravagio                   | <i>Judith Beheadinng Holofernes</i>             | c.1598  |
| Cranach, Lucas the Elder     | <i>Judith Victorious</i>                        | c.1530  |
| Gentileschi, Artemisia       | <i>Judith and Holofernes</i>                    | 1620    |
| Goya, Francisco              | <i>Judith and Holofernes</i>                    | 1819    |
| Klimt, Gustav                | <i>Judith II</i>                                | 1909    |
| Lama, Gulia                  | <i>Judith and Holofernes</i>                    | 1730    |
| Vasari, Giorgio              | <i>Judith and Holofernes</i>                    | c. 1554 |
| Bray, Salomon de             | <i>Judith Delivering the Head of Holofernes</i> | 1636    |
| Vermeyen, Jan Cornelisz      | <i>Judith with Head of Holofernes</i>           | c. 1525 |
| Botticelli, Sandro           | <i>Judith Leaving the Tent of Holofernes</i>    | c. 1495 |
| Cairo, Francesco del         | <i>Judith with Head of Holofernes</i>           | c. 1645 |
| Corot, Jean_Baptiste-Camille | <i>Judith</i>                                   | c. 1872 |
| Giorgione                    | <i>Judith</i>                                   | c.1504  |
| Moser, Koloman               | <i>Judith and Holofernes</i>                    | 1916    |
| Mellin, Charles              | <i>Judith with Head of Holofernes</i>           | 1630    |
| Riedel, August               | <i>Judith</i>                                   | 1840    |
| Piazzetta, Giovanni Battista | <i>Judith and Holofernes</i>                    | c. 1745 |
| Stuck, Franz                 | <i>Judith</i>                                   | 1928    |

|                                |                                      |         |
|--------------------------------|--------------------------------------|---------|
| Valentin de Boulogne           | <i>Judith</i>                        | c. 1626 |
| Picasso, Pablo                 | <i>Bathers in Forest</i>             | 1908    |
| Wouwerman, Philips             | <i>Landscape with Bathers</i>        | c.1660  |
| Cezanne, Paul                  | <i>Bathers</i>                       | 1892    |
| Gaugini, Paul                  | <i>Bathers at Tahiti</i>             | 1897    |
| Kirchner, Ernst Ludwig         | <i>Three Bathers</i>                 | 1913    |
| Peter, Jean Baptiste Joseph    | <i>The Bathers</i>                   | c. 1721 |
| Preisler, Jan                  | <i>Bathers</i>                       | 1912    |
| Renoir, Pierre-Auguste         | <i>The Bathers</i>                   | 1918    |
| Seurat, Georges                | <i>Study for Bathers at Asnieres</i> | 1883    |
| Cezanne, Paul                  | <i>Bathers</i>                       | c. 1900 |
| Bazille, Jean-Frederic         | <i>Bathers (Summer Scene)</i>        | 1869    |
| Carracci                       | <i>Landscape with Bathers</i>        | 1616    |
| Cezanne, Paul                  | <i>The Large Bathers</i>             | c. 1900 |
| Fragonard, Jean-Honore         | <i>The Bathers</i>                   | c. 1772 |
| Walker, Frederick              | <i>The Bathers</i>                   | c. 1866 |
| Gaugini, Paul                  | <i>The Bathers</i>                   | 1897    |
| Matisse, Henri                 | <i>Joy of Life</i>                   | c. 1905 |
| Picasso, Pablo                 | <i>Bathers with Toy Boat</i>         | 1937    |
| Picasso, Pablo                 | <i>Bathers</i>                       | 1918    |
| Courbet, Gustave               | <i>The Bathers</i>                   | 1853    |
| Boucher, Francois              | <i>Blond Odalisque</i>               | 1752    |
| Ingres, Jean-Auguste-Dominique | <i>Odalisque with slave</i>          | 1842    |

|                                |                                                |         |
|--------------------------------|------------------------------------------------|---------|
| Matisse, Henri                 | <i>Odalisque with a Green Plant and Screen</i> | 1923    |
| Matisse, Henri                 | <i>Reclining Odalisque</i>                     | 1926    |
| Picasso, Pablo                 | <i>Femmes d'Alger</i>                          | 1955    |
| Renoir, Pierre-Auguste         | <i>Parisian Women in Agerian Costume</i>       | 1872    |
| Tanoux, Adrien Henri           | <i>Odalisque</i>                               | 1904    |
| Weisz, Adolphe                 | <i>Odalisque</i>                               | 1884    |
| Gervex, Henri                  | <i>Odalisque</i>                               | 1882    |
| Renoir, Auguste                | <i>Reclining Odalisque</i>                     | c. 1917 |
| Bukovac, Vlaho                 | <i>Odalisque</i>                               | 1882    |
| Corot, Jean_Baptiste-Camille   | <i>The Roman Odalisque</i>                     | 1843    |
| Delacroix, Eugene              | <i>The Women of Algiers in Their</i>           | 1834    |
| Ingres, Jean-Auguste-Dominique | <i>The Grand Odalisque</i>                     | 1814    |
| Lefebvre, Jules Joseph         | <i>Odalisque</i>                               | 1874    |
| Leighton, Frederic             | <i>Odalisque</i>                               | 1862    |
| Picasso, Pablo                 | <i>Jacqueline in Turkish Dress</i>             | 1955    |
| Picasso, Pablo                 | <i>The Great Odalisque (after Ingres)</i>      | 1907    |
| Picou, Henri Pierre            | <i>Odalisque</i>                               | 1858    |
| Schiovoni, Natale              | <i>Odalisque</i>                               | 1845    |
| Amaury, Duval                  | <i>La Naissance de Venus</i>                   | 1862    |
| Bouguereau, A.                 | <i>The Birth of Venus</i>                      | 1879    |
| Picasso, Pablo                 | <i>Venus et L'Amour</i>                        | 1957    |
| Giorgione                      | <i>Sleeping Venus</i>                          | c. 1510 |
| Titian                         | <i>Venus and Music</i>                         | 1547    |

|                                   |                                     |         |
|-----------------------------------|-------------------------------------|---------|
| Rubens, Peter Paul                | <i>Venus Frigida</i>                | 1614    |
| Girodet de Roucy-Trison,<br>Louis | <i>Mademoiselle Lange as Venus</i>  | 1798    |
| Tintoretto                        | <i>Venus, Mars and Vulcan</i>       | c. 1551 |
| Carracci                          | <i>Sleeping Venus</i>               | c. 1602 |
| Poussin, Nicholas                 | <i>Venus and Satyr</i>              | 1626    |
| Boucher, Francois                 | <i>The Triumph of Venus</i>         | 1740    |
| Dali, Salvador                    | <i>Venus Binding Cupids</i>         | 1925    |
| Fauconnet, Guy Pierre             | <i>Venus</i>                        | 1919    |
| Gossart, Jan                      | <i>Venus</i>                        | c. 1521 |
| Matisse, Henri                    | <i>Venus</i>                        | 1952    |
| Modigliani, Amadeo                | <i>Venus-Maja</i>                   | 1917    |
| Picasso, Pablo                    | <i>Nude woman with Necklace</i>     | 1968    |
| Rembrandt van Rijn                | <i>Hendrickje Stoffels as Venus</i> | 1662    |
| Rubens, Peter Paul                | <i>Venus at a Mirror</i>            | c. 1615 |
| Sustris, Lambert                  | <i>Venus and Love</i>               | 1550    |

---

*Note.* In fourth column is shown motif categories (1 = *Three Graces*, 2 = *Judith*, 3 = *Bathers*, 4 = *Odalisque*, 5 = *Venus*).
